# Supplementary material for: Multiphasic aqueous hydroformylation of 1-alkenes with micelle-like polymer particles as phase transfer agents
Source: Royal Society of Chemistry journal article supplement (doi:10.1039/c8ra04022b), 2018-01-01
Supplement: c8ra04022b1.pdf [file c8ra04022b1.pdf]

## Supporting Information

### S1. Characterization of the polymer particles

**Table 2.** Zeta Potential and diameters (D) of the polymer particles obtained with different characterization techniques

| Sample | ZP ( $\zeta$ ) | DLS              | AFM (dry)  | SEM        | TEM        |
|--------|----------------|------------------|------------|------------|------------|
|        | (mV)           | $D_h^{[a]}$ (nm) | D (nm)     | D (nm)     | D (nm)     |
| LX5    | + 48           | $95 \pm 1$       | $72 \pm 7$ | $30 \pm 3$ | $32 \pm 3$ |

[a]  $D_h$ : Hydrodynamic Diameter

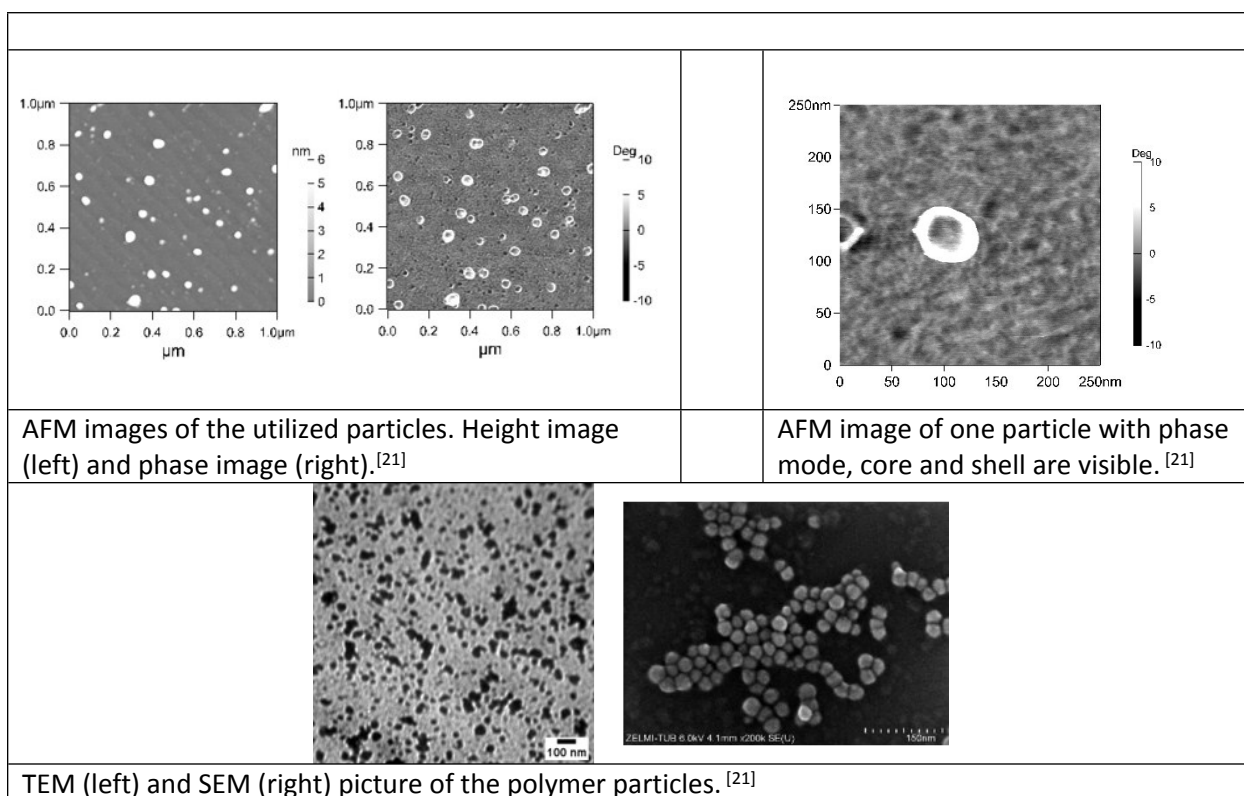

### S2. Phase Separation

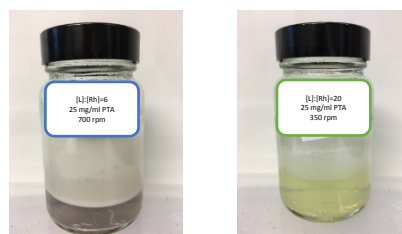

**Figure 2.** Phase separation at A) fast stirring (700 rpm) with 25 mg/ml of PTA and B) slow stirring (350 rpm) with 35 mg/ml of PTA
